# Supplementary material for: Population-wide cerebellar growth models of children and adolescents
Source: PubMed Central journal article supplement (PMC10948906; doi:10.1038/s41467-024-46398-2), 2024-03-18
Supplement: 41467_2024_46398_MOESM1_ESM.pdf [file 41467_2024_46398_MOESM1_ESM.pdf]

1  
2  
3  
4  
5  
6  
7  
8  
9

Supplementary Information for  
"Population-wide Cerebellar Growth Models of Children and Adolescents"

Supplementary Figures

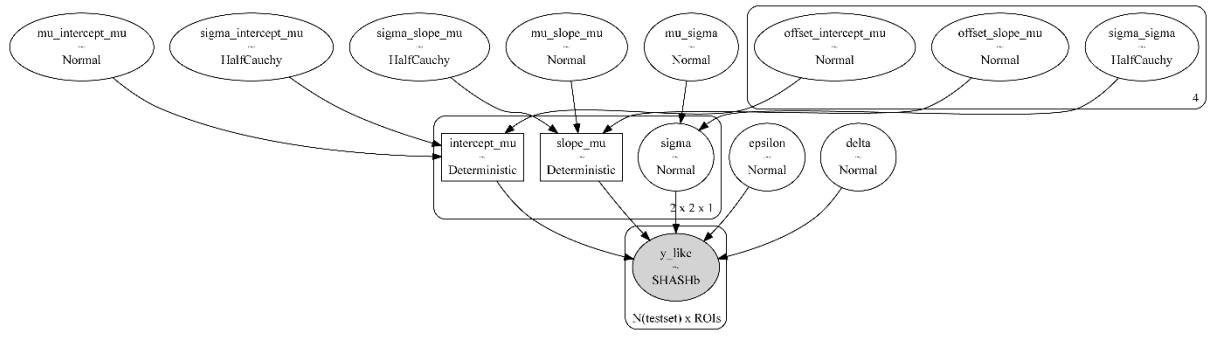

Supplementary Figure 1: Graphical representation of the normative model. Hierarchical structure, model parameters and relationships between parameters are shown. Batch-effects are shown as 2x2 design (2 scanners x 2 sexes).

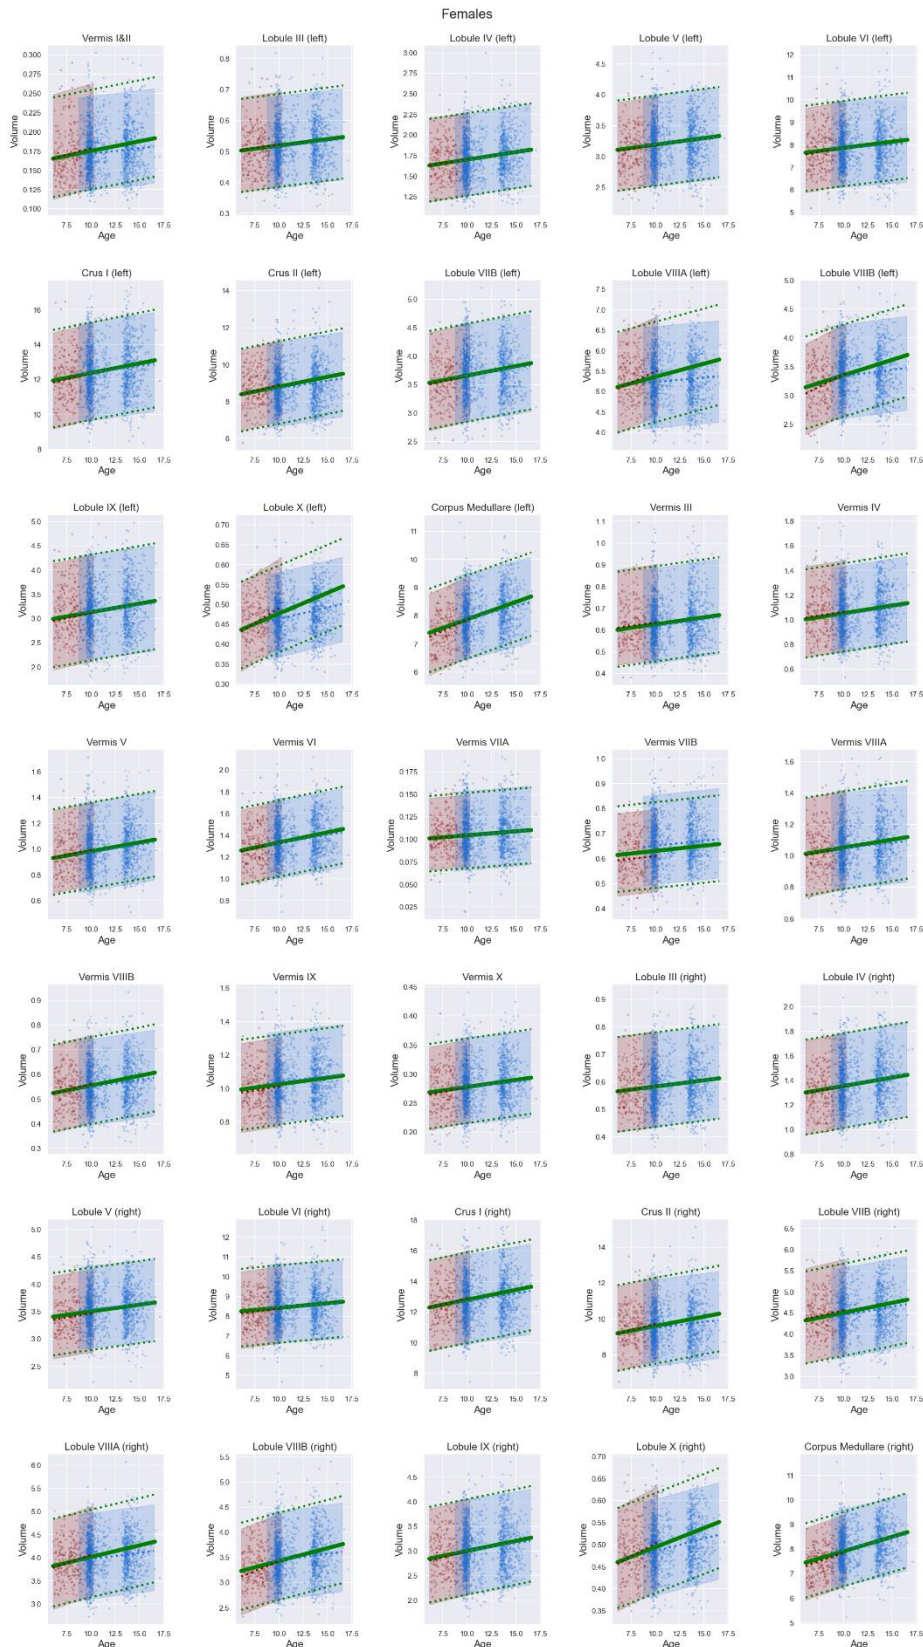

10  
11  
12  
13  
14  
15  
16  
17

Supplementary Figure 2: Growth trajectory for each anatomical ROI for all females.

Bold green lines show the mean trajectory, dotted green lines represent what is within 2 standard deviations of the mean. In red all data points of females acquired on the first scanner (visit 1) are shown. Red dotted line and red shaded area illustrate the mean trajectory and what is within 2 standard deviations considering the batch-effect of the first scanner only. Analogous in blue, data points of females acquired on the second scanner (visit 2 & 3) are shown. Blue dotted line and blue shaded area illustrate the mean trajectory and what is within 2 standard deviations considering the batch-effect of the second scanner only. The y-axis shows volume in cubic centimeters (ccm). Source data are provided as a Source Data file.

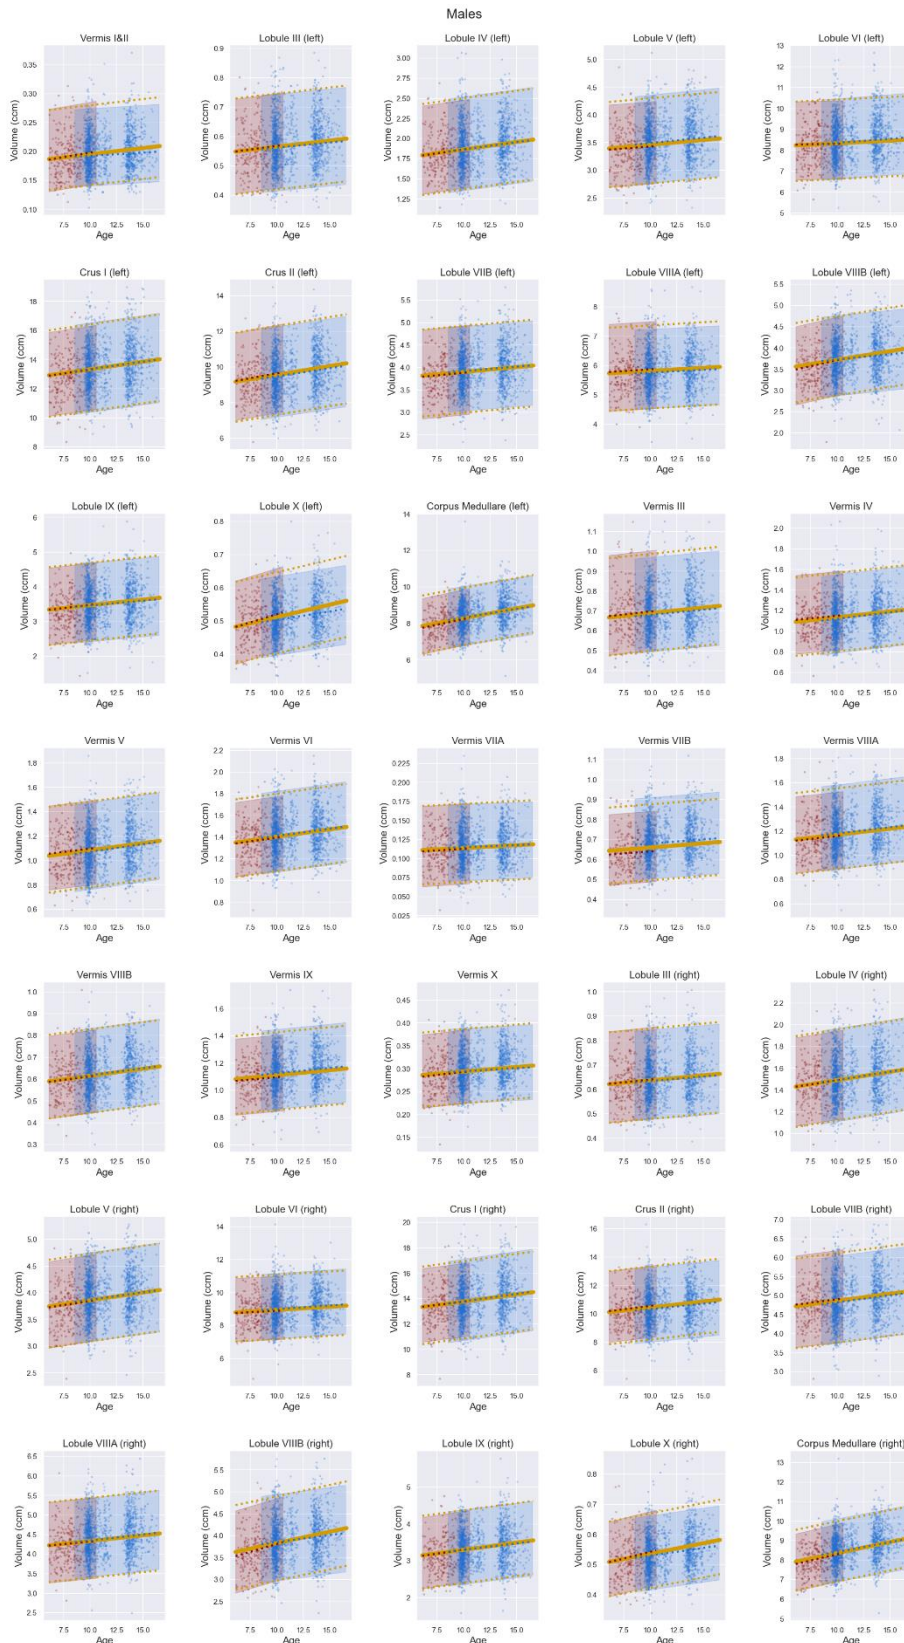

18  
19  
20  
21  
22  
23  
24  
25

Supplementary Figure 3: Growth trajectory for each anatomical ROI for all males.

Bold yellow lines show the mean trajectory, dotted yellow lines represent what is within 2 standard deviations of the mean. In red all data points of males acquired on the first scanner (visit 1) are shown. Red dotted line and red shaded area illustrate the mean trajectory and what is within 2 standard deviations considering the batch-effect of the first scanner only. Analogous in blue, data points of males acquired on the second scanner (visit 2 & 3) are shown. Blue dotted line and blue shaded area illustrate the mean trajectory and what is within 2 standard deviations considering the batch-effect of the second scanner only. The y-axis shows volume in cubic centimeters (ccm). Source data are provided as a Source Data file.



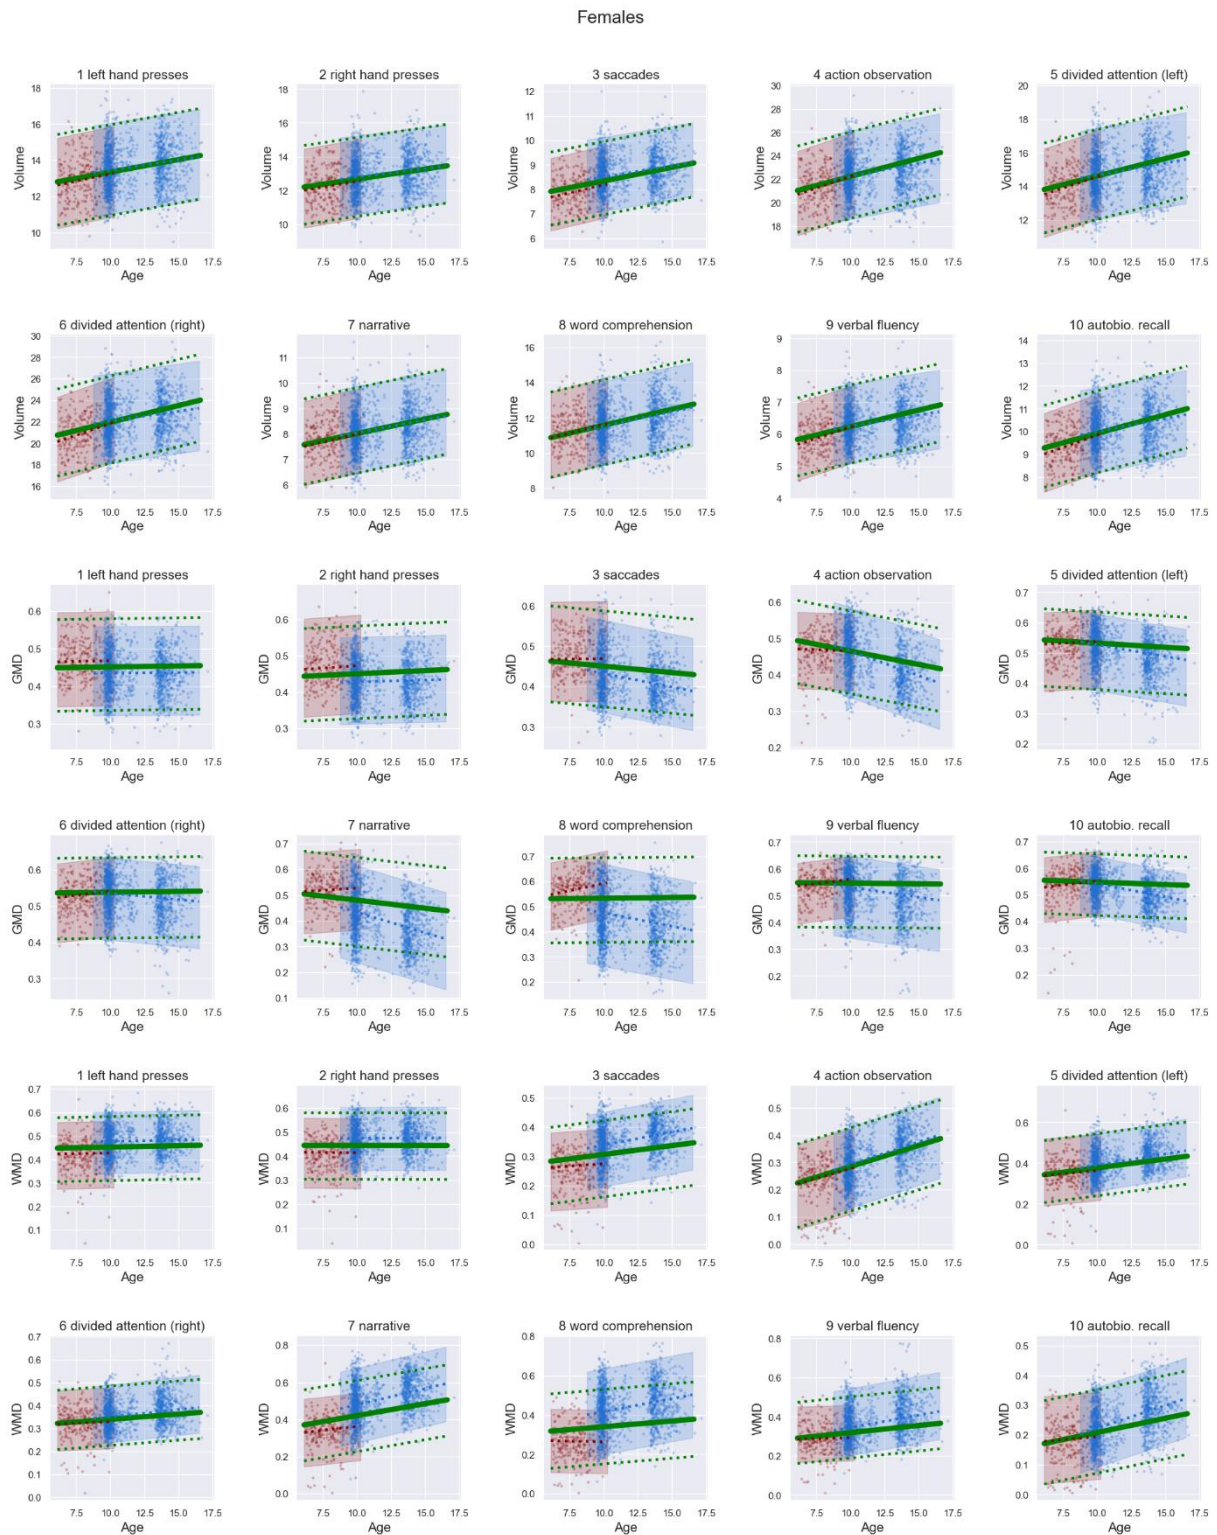

26  
27  
28  
29  
30  
31  
32  
33  
34  
35

Supplementary Figure 4: Growth trajectory for each functional ROI for all females. First 2 rows depict trajectories for volumes, 3<sup>rd</sup> and 4<sup>th</sup> row for GMD, 5<sup>th</sup> and 6<sup>th</sup> row for WMD. Bold green lines show the mean trajectory, dotted green lines represent what is within 2 standard deviations of the mean. In red all data points of females acquired on the first scanner (visit 1) are shown. Red dotted line and red shaded area illustrate the mean trajectory and what is within 2 standard deviations considering the batch-effect of the first scanner only. Analogous in blue, data points of females acquired on the second scanner (visit 2 & 3) are shown. Blue dotted line and blue shaded area illustrate the mean trajectory and what is within 2 standard deviations considering the batch-effect of the second scanner only. Source data are provided as a Source Data file.

Males

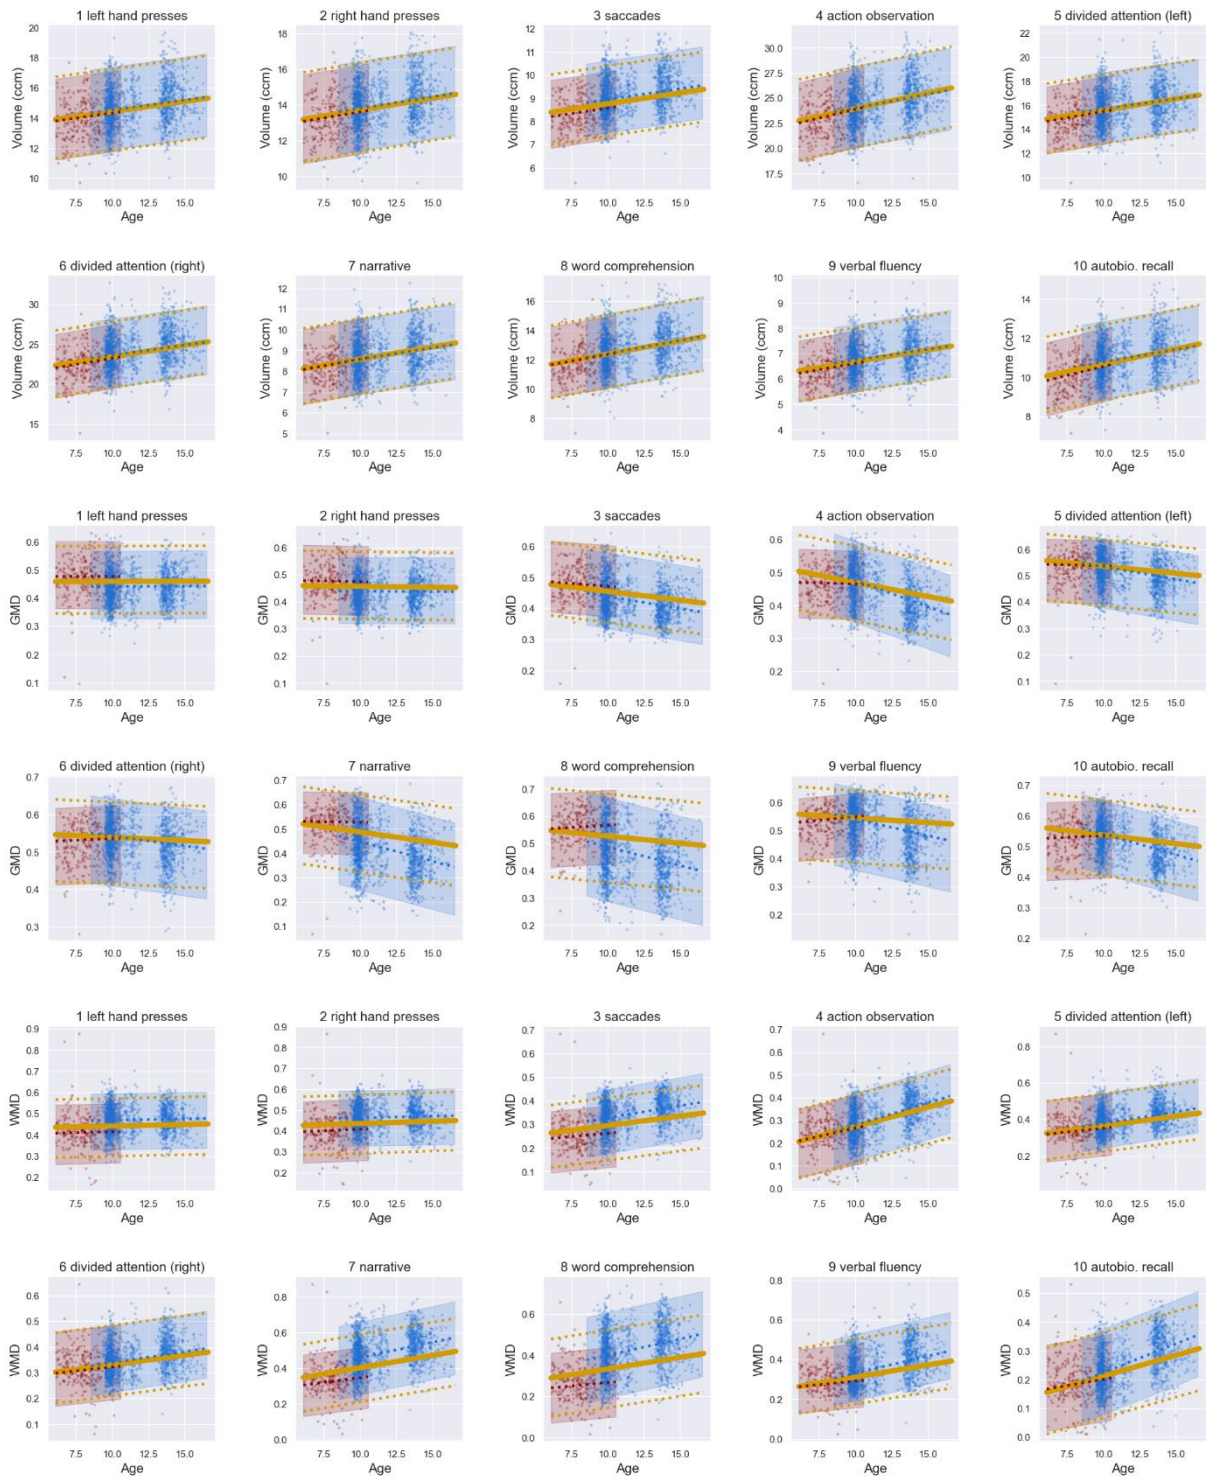

36  
37  
38  
39  
40  
41  
42  
43  
44  
45

Supplementary Figure 5: Growth trajectory for each functional ROI for all males. First 2 rows depict trajectories for volumes, 3<sup>rd</sup> and 4<sup>th</sup> row for GMD, 5<sup>th</sup> and 6<sup>th</sup> row for WMD. Bold yellow lines show the mean trajectory, dotted yellow lines represent what is within 2 standard deviations of the mean. In red all data points of males acquired on the first scanner (visit 1) are shown. Red dotted line and red shaded area illustrate the mean trajectory and what is within 2 standard deviations considering the batch-effect of the first scanner only. Analogous in blue, data points of males acquired on the second scanner (visit 2 & 3) are shown. Blue dotted line and blue shaded area illustrate the mean trajectory and what is within 2 standard deviations considering the batch-effect of the second scanner only. Source data are provided as a Source Data file.

A) Volume

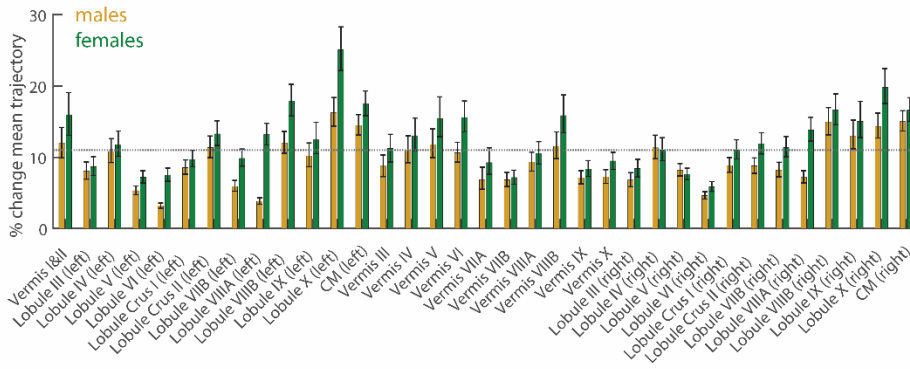

B) Volume

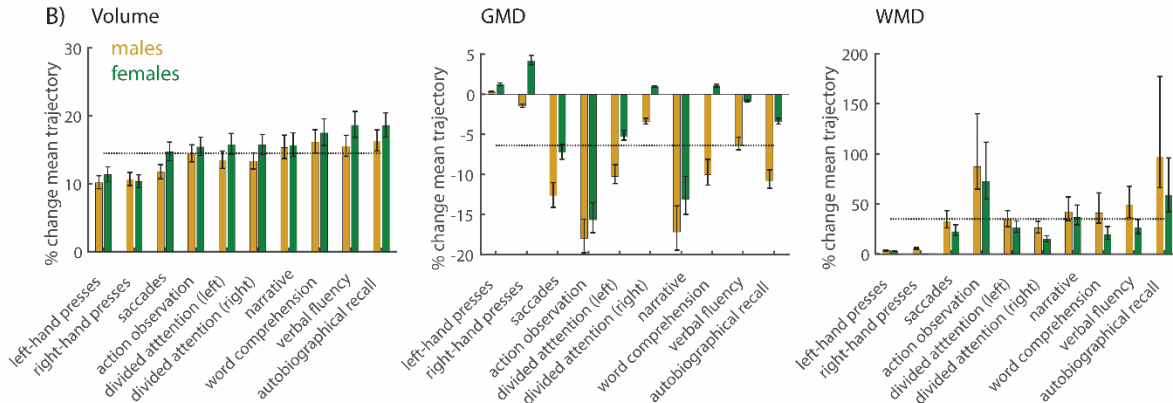

46  
 47 Supplementary Figure 6: Percentage change of the mean linear trajectory of males and females between the ages of 6  
 48 and 17 for the A) volume in the anatomical and B) volume, *Grey Matter Density* (GMD), and *White Matter Density* (WMD) in the  
 49 functional parcellation.  
 50 Horizontal lines depict the mean percentage change over ROIs, error bars represent percentage change with +/- 1 standard  
 51 deviation of the mean trajectory. Important to note: percentage change is highly sensitive to initial values. The more  
 52 extreme the initial value, the more likely is a high percentage change (e.g.: WMD autobiographical recall where initial  
 53 values are very low (see Supplementary Figures 4 & 5)). Source data are provided as a Source Data file.  
 54

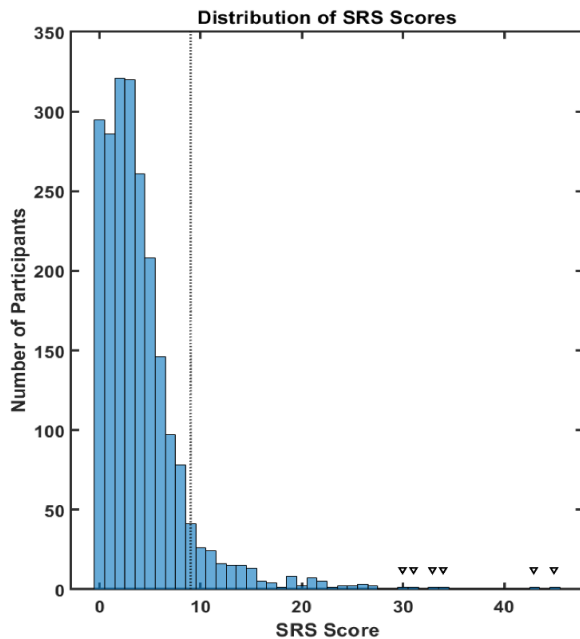

55  
 56 Supplementary Figure 7: Distribution of *Social Responsiveness Scale* (SRS) scores in the Generation R cohort (n=2,210;  
 57 participants without SRS information excluded).  
 58 The dotted line illustrates the 90<sup>th</sup> percentile (raw score >= 9 [n=198]), triangles draw attention to high SRS scores of single  
 59 participants. Source data are provided as a Source Data file.



## Functional parcellation: WMD

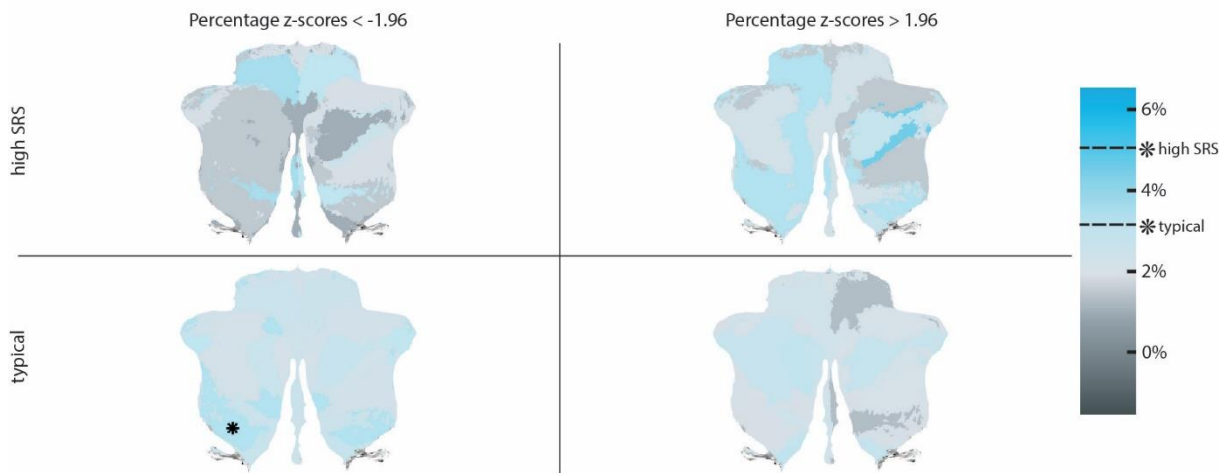

61  
62 Supplementary Figure 8: Percentage of individuals with large negative ( $z$ -score  $< -1.96$ ) and large positive ( $z$ -score  $> 1.96$ )  
63 deviations in *White Matter Density* (WMD) in functional ROIs.

64 Asterisks indicate ROIs in which children with high SRS and children with typical SRS scores have a significantly higher  
65 percentages of large deviation than expected (typical  $> 3.13\%$ , high SRS  $> 5.05\%$ ; binomial test,  $p < 0.05$ ). Top row: children  
66 with high SRS scores, likely to fall on the Autism spectrum. Bottom row: typically developing children. Source data are  
67 provided as a Source Data file.  
68

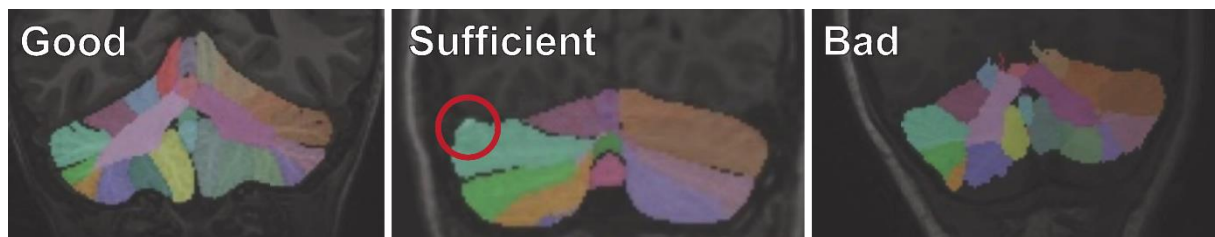

69  
70 Supplementary Figure 9: Visual examples of segmented scans rated as either good, sufficient, or bad.  
71 Inaccuracies of only a few voxels were rated as sufficient (e.g., vasculature was captured marked by red circle), whereas  
72 marked inaccuracies throughout several parcels were rated as bad and therefore excluded from analysis.  
73

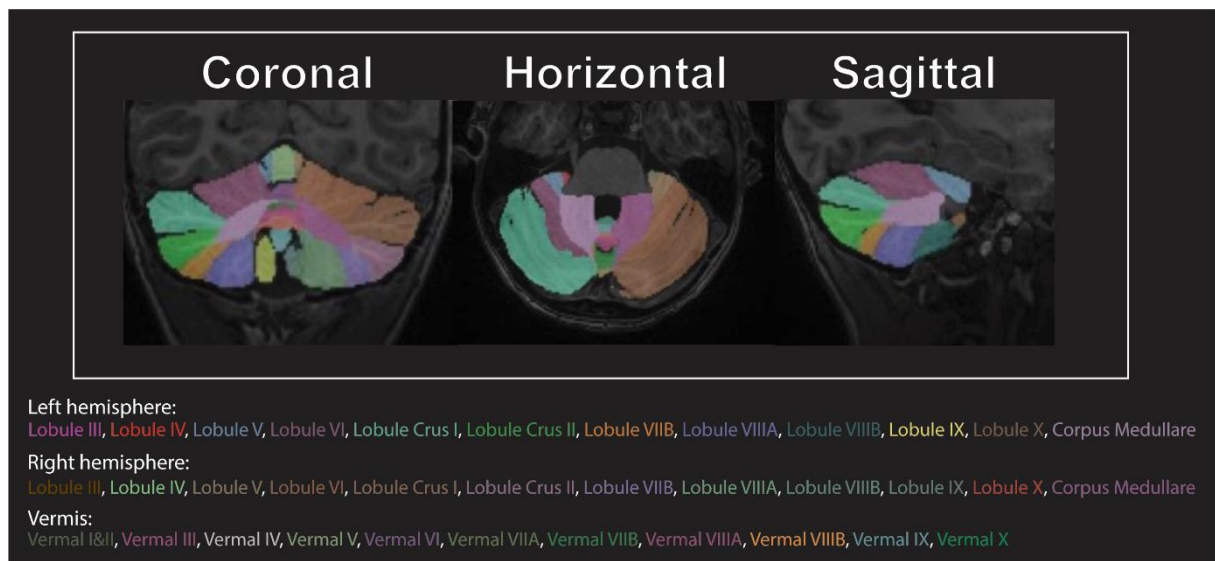

74  
75 Supplementary Figure 10: Example scan that was automatically segmented in anatomical ROIs using the MAGeT algorithm.  
76 Labels for each ROI in their respective colors are shown. The MAGeT algorithm subdivides the cerebellum into 11 vermal and  
77 22 hemispheric lobules (11 on each hemisphere). Additionally, the central white matter, the corpus medullare, is segmented  
78 in each hemisphere. White matter that extends into the folia of the lobules was segmented as part of the lobules.  
79

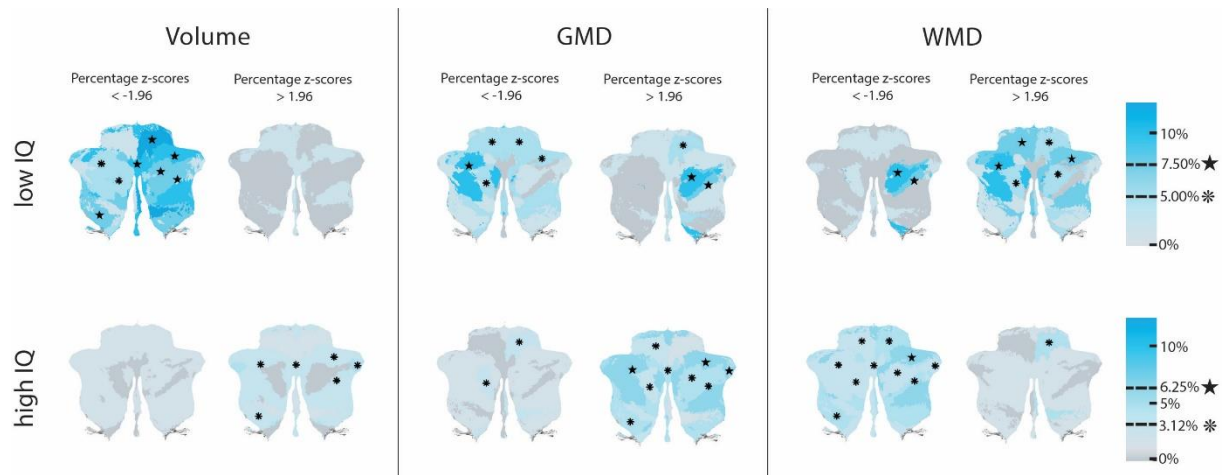

80

81 Supplementary Figure 11: Large deviations in functional ROIs stratified by IQ.

82 Percentage of individuals with large negative (z-score < -1.96) and large positive (z-score > 1.96) deviations in volume, *Grey*  
 83 *Matter Density* (GMD), and *White Matter Density* (WMD) in functional ROIs is shown. Results are stratified in low (<70 [n=40])  
 84 and high IQ (>130 [n=64]). As sample sizes differ between IQ groups, and thus expected proportions of extreme deviations  
 85 under the null hypothesis differ as well, significance of the percentage of children with large deviations at the  $p = 0.05$  and  $p$   
 86  $= 0.01$  level were evaluated using Binomial testing (observed vs. expected number of participants with  $z > 1.96 / z < -1.96$  in  
 87 low and high IQ children, given a null hypothesized probability of  $p_0 = 0.025$ , one-sided). Asterisks ( $p < 0.05$ ) and stars ( $p < 0.01$ )  
 88 indicate ROIs in which children have a significantly higher percentages of large deviation than expected (low IQ > 5.00%  
 89 ( $p < 0.05$ ) and > 7.50% ( $p < 0.01$ ), high IQ > 3.12% ( $p < 0.05$ ) and > 6.25% ( $p < 0.01$ )). Children in the low IQ group present with  
 90 lower volumes than expected throughout several ROIs particularly on the right hemisphere (negative deviations at  $p < 0.01$   
 91 level: 2 Right-hand (motor) presses, 3 Saccades, 4 Action observation, 6 Divided attention (right hemisphere), 8 Word  
 92 comprehension, and 9 Verbal fluency). Lower IQ was further associated with more negative as well as positive deviations in  
 93 GMD (negative deviations at  $p < 0.01$  level: 5 Divided attention (left hemisphere); positive deviations at  $p < 0.01$  level: 8 Word  
 94 comprehension, and 9 Verbal fluency) and WMD (negative deviations at  $p < 0.01$  level: 8 Word comprehension, and 9 Verbal  
 95 fluency; positive deviations at  $p < 0.01$  level: 1 Left-hand (motor) presses, 5 Divided attention (left hemisphere), 6 Divided  
 96 attention (right hemisphere)) specifically in posterior ROIs relating to cognitive function. Interestingly, high deviations in the  
 97 same ROIs can be seen in the low and high IQ group in GMD and WMD. This might relate to non-linear effects of IQ on brain  
 98 structure. Source data are provided as a Source Data file.

99

100

101

102

103

104

105 **Supplementary Tables**



Supplementary Table 1: sample characteristics of the training and test sets

|                                                               | Training set<br>n=3,689 |                      |                      | Test set<br>n=3,581   |                       |                       | Total<br>n=7,270     |
|---------------------------------------------------------------|-------------------------|----------------------|----------------------|-----------------------|-----------------------|-----------------------|----------------------|
|                                                               | Visit 1<br>n=496        | Visit 2<br>n=1,961   | Visit 3<br>n=1,319   | Visit 1<br>n=483      | Visit 2<br>n=1,968    | Visit 3<br>n=1,224    |                      |
| Age<br>Mean [Range]                                           | 7.9 [6.1 – 10.7]        | 10.1 [8.7 – 12.0]    | 14.0 [12.7 – 16.6]   | 7.9 [6.2 – 10.7]      | 10.1 [8.6 – 12.0]     | 14.0 [12.6 – 17.1]    | 11.2 [6.1 – 17.1]    |
| Sex<br>(M   F)                                                | 53.8%   46.2%           | 48.1%   51.9%        | 47.6%   52.4%        | 50.9%   49.1%         | 51.2%   48.8%         | 48.2%   51.8%         | 49.4%   50.6%        |
| Income<br>(Low   Medium   High)                               | 4.9%   38.3%   47.9%    | 6.0%   31.2%   49.8% | 4.5%   34.3%   49.7% | 7.7%   38.9%   45.9%  | 4.8%   34.1%   49.1%  | 5.0%   33.2%   47.7%  | 5.3%   33.8%   48.9% |
| Education Mother<br>(Low   High)                              | 39.6%   60.4%           | 33.5%   66.5%        | 34.1%   65.9%        | 42.2%   57.8%         | 34.9%   65.1%         | 35.6%   64.4%         | 35.3%   64.7%        |
| IQ<br>(Low   Medium   High)                                   | 12.2%   59.8%   15.6%   | 9.1%   56.9%   15.8% | 8.5%   57.7%   17.2% | 11.4%   60.3%   16.2% | 10.1%   53.7%   18.3% | 10.6%   55.7%   15.5% | 9.8%   56.4%   16.7% |
| Ethnicity<br>(Dutch   European<br>(Non-Dutch)   Non-European) | 68.0%   6.5%   25.6%    | 59.6%   8.5%   30.4% | 60.0%   8.3%   29.5% | 67.8%   6.7%   25.6%  | 58.2%   8.4%   30.9%  | 57.6%   9.2%   30.9%  | 60.1%   8.3%   29.8% |
| CBCL<br>(Low   High )                                         | 58.6%   22.9%           | 67.1%   17.1%        | 64.3%   17.0%        | 57.6%   19.3%         | 67.7%   16.9%         | 65.0%   14.3%         | 65.2%   17.1%        |

\* percentages do not always add up to 100% due to missing data from some participants

| ROI                                | linear<br>loo [SE] | bspline<br>loo [SE] | difference [SE of difference] |
|------------------------------------|--------------------|---------------------|-------------------------------|
| Vermis I & II                      | -4910.89 [45.54]   | -4911.74 [45.45]    | 0.85 [2.58]                   |
| Lobule III (left)                  | -5034.17 [43.25]   | -5036.97 [43.29]    | 2.79 [2.51]                   |
| Lobule IV (left)                   | -4966.64 [44.45]   | -4984.73 [44.56]    | 2.10 [2.45]                   |
| Lobule V (left)                    | -4940.60 [42.93]   | -4945.15 [43.04]    | 4.55 [1.95]                   |
| Lobule VI (left)                   | -5078.43 [45.37]   | -5082.04 [45.35]    | 3.61 [1.73]                   |
| Lobule Crus 1 (left)               | -4992.30 [43.99]   | -4995.34 [43.96]    | 3.04 [1.67]                   |
| Lobule Crus 2 (left)               | -4981.02 [45.78]   | -4980.35 [45.78]    | 0.67 [3.10]                   |
| Lobule VIIIB (left)                | -5066.31 [44.01]   | -5069.97 [44.05]    | 3.66 [1.88]                   |
| Lobule VIIIA (left)                | -4915.24 [45.22]   | -4914.21 [45.11]    | 1.03 [3.25]                   |
| Lobule VIIIB (left)                | -4800.77 [45.32]   | -4799.91 [45.44]    | 0.86 [3.30]                   |
| Lobule IX (left)                   | -5040.51 [46.02]   | -5042.22 [46.03]    | 1.72 [2.75]                   |
| Lobule X (left)                    | -4914.25 [45.01]   | -4913.38 [44.96]    | 0.87 [3.47]                   |
| Corpus medullare (left)            | -4929.63 [45.65]   | -4925.68 [45.68]    | 3.95 [3.79]                   |
| Vermis III                         | -4961.70 [46.54]   | -4965.54 [46.48]    | 3.84 [1.89]                   |
| Vermis IV                          | -5067.51 [45.57]   | -5072.15 [45.20]    | 4.64 [1.43]                   |
| Vermis V                           | -5005.63 [42.50]   | -5009.64 [42.44]    | 4.01 [1.68]                   |
| Vermis VI                          | -5060.31 [44.72]   | -5063.01 [44.90]    | 2.71 [2.31]                   |
| Vermis VIIA                        | -5084.65 [47.27]   | -5089.64 [47.14]    | 4.99 [1.63]                   |
| Vermis VIIB                        | -5050.23 [44.62]   | -5056.92 [44.61]    | 6.70 [1.10]                   |
| Vermis VIIIA                       | -4840.80 [45.91]   | -4843.85 [45.90]    | 3.06 [2.24]                   |
| Vermis VIIIB                       | -4916.88 [43.85]   | -4920.07 [43.98]    | 3.19 [2.13]                   |
| Vermis IX                          | -4994.13 [45.09]   | -4997.92 [45.06]    | 3.79 [2.15]                   |
| Vermis X                           | -5056.58 [48.49]   | -5058.67 [48.53]    | 2.10 [2.17]                   |
| Lobule III (right)                 | -5017.72 [45.46]   | -5020.44 [45.58]    | 2.72 [2.00]                   |
| Lobule IV (right)                  | -4966.79 [43.61]   | -4968.72 [43.56]    | 1.93 [2.13]                   |
| Lobule V (right)                   | -4835.30 [45.11]   | -4838.61 [45.17]    | 3.31 [1.99]                   |
| Lobule VI (right)                  | -5067.93 [45.63]   | -5072.41 [45.72]    | 4.48 [1.41]                   |
| Lobule Crus 1 (right)              | -4974.52 [43.50]   | -4977.94 [43.50]    | 3.42 [1.90]                   |
| Lobule Crus 2 (right)              | -4970.96 [44.83]   | -4972.03 [44.79]    | 1.07 [2.73]                   |
| Lobule VIIIB (right)               | -4997.19 [43.77]   | -5001.44 [43.69]    | 4.25 [2.10]                   |
| Lobule VIIIA (right)               | -4920.04 [45.58]   | -4921.01 [45.61]    | 0.97 [2.76]                   |
| Lobule VIIIB (right)               | -4778.78 [45.31]   | -4781.65 [45.30]    | 2.87 [2.44]                   |
| Lobule IX (right)                  | -5018.76 [44.65]   | -5018.51 [44.57]    | 0.25 [3.17]                   |
| Lobule X (right)                   | -4905.17 [43.62]   | -4908.13 [43.62]    | 2.96 [2.34]                   |
| Corpus medullare (right)           | -4892.49 [46.78]   | -4892.19 [46.79]    | 0.30 [3.29]                   |
| left hand presses (Volume)         | -4814.67 [44.80]   | -4818.54 [44.91]    | 3.87 [2.11]                   |
| right hand presses (Volume)        | -4783.62 [45.92]   | -4786.92 [46.00]    | 3.30 [2.13]                   |
| saccades (Volume)                  | -4822.83 [44.19]   | -4825.58 [44.40]    | 2.75 [2.40]                   |
| action observation (Volume)        | -4708.00 [44.40]   | -4709.21 [44.45]    | 1.22 [2.73]                   |
| divided attention (left) (Volume)  | -4838.92 [44.82]   | -4838.44 [44.80]    | 0.47 [3.15]                   |
| divided attention (right) (Volume) | -4808.71 [46.02]   | -4811.82 [46.02]    | 3.11 [2.00]                   |
| narrative (Volume)                 | -4924.14 [42.77]   | -4923.69 [42.69]    | 0.45 [3.35]                   |
| word comprehension (Volume)        | -4833.15 [43.01]   | -4834.34 [43.07]    | 1.19 [2.62]                   |
| verbal fluency (Volume)            | -4776.38 [44.56]   | -4778.28 [44.60]    | 1.91 [2.68]                   |
| autobiographical recall (Volume)   | -4728.35 [44.27]   | -4729.09 [44.36]    | 0.74 [2.80]                   |
| left hand presses (GMD)            | -5166.46 [44.01]   | -5156.58 [44.39]    | 9.87 [5.50]                   |
| right hand presses (GMD)           | -5147.05 [45.60]   | -5142.16 [45.83]    | 4.89 [4.03]                   |
| saccades (GMD)                     | -4930.29 [48.30]   | -4920.94 [48.40]    | 9.34 [4.39]                   |
| action observation (GMD)           | -4857.93 [43.38]   | -4845.04 [43.32]    | 12.89 [6.43]                  |
| divided attention (left) (GMD)     | -4998.79 [46.76]   | -4989.39 [46.91]    | 9.40 [5.10]                   |
| divided attention (right) (GMD)    | -5135.83 [45.19]   | -5130.88 [45.38]    | 4.95 [4.15]                   |
| narrative (GMD)                    | -4743.98 [45.23]   | -4729.98 [45.35]    | 14.00 [5.59]                  |
| word comprehension (GMD)           | -4840.82 [48.20]   | -4832.78 [48.15]    | 8.05 [5.07]                   |
| verbal fluency (GMD)               | -4882.19 [46.91]   | -4876.16 [47.06]    | 6.03 [5.09]                   |
| autobiographical recall (GMD)      | -4939.08 [48.31]   | -4916.27 [48.08]    | 22.81 [7.89]                  |
| left hand presses (WMD)            | -5067.61 [47.37]   | -5055.36 [47.57]    | 12.25 [5.83]                  |
| right hand presses (WMD)           | -5037.57 [48.02]   | -5031.54 [48.34]    | 6.02 [4.45]                   |
| saccades (WMD)                     | -4717.58 [50.32]   | -4702.22 [50.21]    | 15.35 [5.66]                  |
| action observation (WMD)           | -4707.40 [43.81]   | -4695.48 [44.00]    | 11.92 [5.74]                  |
| divided attention (left) (WMD)     | -4858.86 [49.10]   | -4844.21 [49.28]    | 14.65 [5.85]                  |
| divided attention (right) (WMD)    | -5008.70 [47.83]   | -5000.85 [48.34]    | 7.85 [4.94]                   |
| narrative (WMD)                    | -4556.83 [46.12]   | -4541.50 [46.25]    | 15.33 [5.74]                  |
| word comprehension (WMD)           | -4604.72 [48.00]   | -4595.59 [47.95]    | 9.14 [5.11]                   |
| verbal fluency (WMD)               | -4756.39 [46.60]   | -4744.21 [46.94]    | 12.18 [5.85]                  |
| autobiographical recall (WMD)      | -4696.75 [45.18]   | -4665.38 [45.19]    | 31.37 [8.81]                  |

Supplementary Table 2: *Leave-one-out* (LOO) Cross Validation. LOO, *standard error* (SE) for the LOO computations of linear and b-spline models are shown as well for difference in LOO and the SE of the difference for all anatomical and functional ROIs.

| Anatomical lobular ROIs              | Volume Mean standardized $\beta$ Age [95%CI Mean] |                                                | Anatomical vermal ROIs           | Volume Mean standardized $\beta$ Age [95%CI Mean] |
|--------------------------------------|---------------------------------------------------|------------------------------------------------|----------------------------------|---------------------------------------------------|
|                                      | Left hemisphere                                   | Right hemisphere                               |                                  |                                                   |
|                                      |                                                   |                                                | Vermis I&II<br>MALES<br>FEMALES  | 0.142 [1.140 – 1.44]<br>0.167 [0.165 – 0.169]     |
| Lobule III<br>MALES<br>FEMALES       | 0.116 [0.115 – 0.117]<br>0.115 [0.114 – 0.116]    | 0.100 [0.099 - 0.100]<br>0.112 [0.111 - 0.113] | Vermis III<br>MALES<br>FEMALES   | 0.107 [0.106 - 0.108]<br>0.124 [0.123 - 0.124]    |
| Lobule IV<br>MALES<br>FEMALES        | 0.148 [0.147 – 0.149]<br>0.146 [0.146 – 0.147]    | 0.162 [0.162 - 0.163]<br>0.144 [0.143 - 0.145] | Vermis IV<br>MALES<br>FEMALES    | 0.138 [0.137 - 0.139]<br>0.151 [0.150 - 0.152]    |
| Lobule V<br>MALES<br>FEMALES         | 0.095 [0.094 – 0.096]<br>0.117 [0.116 – 0.118]    | 0.154 [0.153 - 0.155]<br>0.130 [0.129 - 0.132] | Vermis V<br>MALES<br>FEMALES     | 0.144 [0.143 - 0.145]<br>0.169 [0.168 - 0.170]    |
| Lobule VI<br>MALES<br>FEMALES        | 0.058 [0.056 – 0.059]<br>0.126 [0.124 – 0.128]    | 0.086 [0.085 - 0.087]<br>0.102 [0.101 - 0.104] | Vermis VI<br>MALES<br>FEMALES    | 0.165 [0.164 - 0.166]<br>0.226 [0.224 - 0.228]    |
| Crus I<br>MALES<br>FEMALES           | 0.153 [0.152 – 0.154]<br>0.161 [0.160 – 0.162]    | 0.156 [0.155 - 0.157]<br>0.179 [0.177 - 0.180] | Vermis VIIA<br>MALES<br>FEMALES  | 0.069 [0.068 - 0.070]<br>0.085 [0.084 - 0.086]    |
| Crus II<br>MALES<br>FEMALES          | 0.178 [0.177 – 0.179]<br>0.191 [0.189 – 0.192]    | 0.145 [0.144 - 0.146]<br>0.179 [0.177 - 0.180] |                                  |                                                   |
| Lobule VIIB<br>MALES<br>FEMALES      | 0.104 [0.103 – 0.105]<br>0.160 [0.158 – 0.161]    | 0.142 [0.141 - 0.143]<br>0.181 [0.179 - 0.182] | Vermis VIIB<br>MALES<br>FEMALES  | 0.098 [0.097 - 0.098]<br>0.098 [0.097 - 0.098]    |
| Lobule VIIIA<br>MALES<br>FEMALES     | 0.069 [0.067 – 0.070]<br>0.210 [0.207 – 0.213]    | 0.126 [0.125 - 0.128]<br>0.219 [0.217 - 0.222] | Vermis VIIIA<br>MALES<br>FEMALES | 0.129 [0.128 - 0.130]<br>0.130 [0.129 - 0.132]    |
| Lobule VIIIB<br>MALES<br>FEMALES     | 0.192 [0.190 – 0.194]<br>0.252 [0.249 – 0.255]    | 0.229 [0.227 - 0.231]<br>0.227 [0.224 - 0.229] | Vermis VIIIB<br>MALES<br>FEMALES | 0.149 [0.147 - 0.150]<br>0.181 [0.180 - 0.183]    |
| Lobule IX<br>MALES<br>FEMALES        | 0.129 [0.127 - 0.130]<br>0.141 [0.139 - 0.142]    | 0.171 [0.170 - 0.172]<br>0.179 [0.177 - 0.180] | Vermis IX<br>MALES<br>FEMALES    | 0.113 [0.112 - 0.114]<br>0.121 [0.121 - 0.122]    |
| Lobule X<br>MALES<br>FEMALES         | 0.280 [0.277 - 0.282]<br>0.390 [0.386 - 0.394]    | 0.250 [0.248 - 0.251]<br>0.312 [0.310 - 0.315] | Vermis X<br>MALES<br>FEMALES     | 0.115 [0.113 - 0.116]<br>0.140 [0.139 - 0.142]    |
| Corpus medullare<br>MALES<br>FEMALES | 0.293 [0.292 - 0.295]<br>0.334 [0.331 - 0.336]    | 0.303 [0.301 - 0.304]<br>0.315 [0.313 - 0.317] |                                  |                                                   |

Supplementary Table 3: Mean standardized age  $\beta$  coefficients (slopes) and 95% confidence interval (CI) of the mean for all anatomical ROIs stratified by sex. While all slopes are significantly different from 0, some effects (standardized coefficients) are small.



| FUNCTIONAL REGIONS          | VOLUME                                  | GMD                                     | WMD                                     |
|-----------------------------|-----------------------------------------|-----------------------------------------|-----------------------------------------|
|                             | MEAN STANDARDIZED B AGE<br>[95%CI MEAN] | MEAN STANDARDIZED B AGE<br>[95%CI MEAN] | MEAN STANDARDIZED B AGE<br>[95%CI MEAN] |
| 1 LEFT-HAND PRESSES         | Males                                   | 0.211 [0.210 - 0.212]                   | 0.005 [0.005 - 0.006]                   |
|                             | Females                                 | 0.217 [0.216 - 0.218]                   | 0.020 [0.019 - 0.021]                   |
| 2 RIGHT-HAND PRESSES        | Males                                   | 0.227 [0.226 - 0.228]                   | -0.023 [-0.025 - -0.022]                |
|                             | Females                                 | 0.204 [0.203 - 0.205]                   | 0.065 [0.063 - 0.066]                   |
| 3 SACCADES                  | Males                                   | 0.254 [0.253 - 0.255]                   | -0.206 [-0.208 - -0.204]                |
|                             | Females                                 | 0.299 [0.297 - 0.301]                   | -0.114 [-0.117 - -0.111]                |
| 4 ACTION OBSERVATION        | Males                                   | 0.317 [0.316 - 0.318]                   | 0.452 [0.450 - 0.454]                   |
|                             | Females                                 | 0.314 [0.312 - 0.316]                   | -0.250 [-0.253 - -0.246]                |
| 5 DIVIDED ATTENTION (LEFT)  | Males                                   | 0.279 [0.277 - 0.280]                   | -0.186 [-0.189 - -0.183]                |
|                             | Females                                 | 0.304 [0.302 - 0.306]                   | -0.093 [-0.097 - -0.090]                |
| 6 DIVIDED ATTENTION (RIGHT) | Males                                   | 0.278 [0.277 - 0.280]                   | 0.304 [0.302 - 0.306]                   |
|                             | Females                                 | 0.305 [0.302 - 0.308]                   | -0.070 [-0.073 - -0.067]                |
| 7 NARRATIVE                 | Males                                   | 0.282 [0.281 - 0.284]                   | 0.154 [0.152 - 0.156]                   |
|                             | Females                                 | 0.269 [0.268 - 0.271]                   | 0.019 [0.016 - 0.022]                   |
| 8 WORD COMPREHENSION        | Males                                   | 0.282 [0.281 - 0.284]                   | 0.269 [0.267 - 0.270]                   |
|                             | Females                                 | 0.269 [0.268 - 0.271]                   | -0.137 [-0.141 - -0.133]                |
| 8 WORD COMPREHENSION        | Males                                   | 0.300 [0.299 - 0.301]                   | 0.210 [0.208 - 0.212]                   |
|                             | Females                                 | 0.301 [0.300 - 0.303]                   | 0.107 [0.104 - 0.110]                   |
| 9 VERBAL FLUENCY            | Males                                   | 0.298 [0.297 - 0.300]                   | 0.299 [0.296 - 0.301]                   |
|                             | Females                                 | 0.331 [0.328 - 0.333]                   | -0.099 [-0.104 - -0.095]                |
| 10 AUTOBIOGRAPHICAL RECALL  | Males                                   | 0.298 [0.297 - 0.300]                   | 0.176 [0.174 - 0.179]                   |
|                             | Females                                 | 0.342 [0.340 - 0.345]                   | -0.013 [-0.017 - -0.009]                |
| 10 AUTOBIOGRAPHICAL RECALL  | Males                                   | 0.326 [0.324 - 0.328]                   | 0.408 [0.404 - 0.411]                   |
|                             | Females                                 | 0.342 [0.340 - 0.345]                   | -0.067 [-0.073 - -0.062]                |

Supplementary Table 4: Mean standardized age  $\beta$  coefficients (slopes) and 95% *confidence interval* (CI) of the mean for all functional ROIs stratified by sex. While all slopes are significantly different from 0, some effects (standardized coefficients) are very small (e.g. GMD hand presses).

| Functional region           | Anatomical location of centroid |
|-----------------------------|---------------------------------|
| 1 left-hand presses         | Lobule V (left)                 |
| 2 right-hand presses        | Lobule V (right)                |
| 3 saccades                  | Lobule VIIIA (vermal)           |
| 4 action observation        | Lobule IX (left)                |
| 5 divided attention (left)  | Lobule Crus I (left)            |
| 6 divided attention (right) | Lobule VI (right)               |
| 7 narrative                 | Lobule Crus II (left)           |
| 8 word comprehension        | Lobule Crus II (right)          |
| 9 verbal fluency            | Lobule Crus I (right)           |
| 10 autobiographical recall  | Lobule VIIIB (left)             |

Supplementary Table 5: Anatomical location of centroids (center point of each of the 10 ROIs) of functional regions.

| ROI                             | SRS score |       |         |                          | Square-root transformed SRS score |       |         |                          | R <sup>2</sup><br>adjusted |
|---------------------------------|-----------|-------|---------|--------------------------|-----------------------------------|-------|---------|--------------------------|----------------------------|
|                                 | Estimate  | SE    | p-value | FDR corrected<br>p-value | Estimate                          | SE    | p-value | FDR corrected<br>p-value |                            |
| Vermis I & II                   | -0.223    | 0.220 | 0.309   | 0.994                    | 0.055                             | 0.217 | 0.799   | 0.874                    | 0.001                      |
| Lobule III (left)               | -0.199    | 0.214 | 0.353   | 0.994                    | -0.007                            | 0.211 | 0.973   | 0.973                    | 0.002                      |
| Lobule IV (left)                | -0.261    | 0.214 | 0.223   | 0.994                    | 0.040                             | 0.211 | 0.851   | 0.903                    | 0.002                      |
| Lobule V (left)                 | -0.005    | 0.217 | 0.982   | 0.994                    | -0.242                            | 0.214 | 0.258   | 0.437                    | 0.003                      |
| Lobule VI (left)                | -0.115    | 0.220 | 0.600   | 0.994                    | -0.217                            | 0.217 | 0.317   | 0.462                    | 0.005                      |
| Lobule Crus 1 (left)            | -0.089    | 0.218 | 0.682   | 0.994                    | -0.283                            | 0.215 | 0.188   | 0.391                    | 0.007                      |
| Lobule Crus 2 (left)            | 0.128     | 0.214 | 0.551   | 0.994                    | -0.412                            | 0.211 | 0.052   | 0.208                    | 0.004                      |
| Lobule VIIIB (left)             | 0.229     | 0.213 | 0.281   | 0.994                    | -0.650                            | 0.210 | 0.002*  | 0.068                    | 0.011                      |
| Lobule VIIIA (left)             | 0.141     | 0.214 | 0.511   | 0.994                    | -0.602                            | 0.211 | 0.004*  | 0.077                    | 0.013                      |
| Lobule VIIIB (left)             | 0.006     | 0.222 | 0.979   | 0.994                    | -0.311                            | 0.219 | 0.156   | 0.389                    | 0.004                      |
| Lobule IX (left)                | -0.187    | 0.212 | 0.379   | 0.994                    | -0.106                            | 0.210 | 0.613   | 0.716                    | 0.004                      |
| Lobule X (left)                 | 0.087     | 0.220 | 0.692   | 0.994                    | -0.371                            | 0.217 | 0.087   | 0.277                    | 0.004                      |
| Corpus medullare (left)         | -0.050    | 0.216 | 0.816   | 0.994                    | -0.184                            | 0.213 | 0.388   | 0.543                    | 0.002                      |
| Vermis III                      | -0.188    | 0.214 | 0.379   | 0.994                    | 0.067                             | 0.211 | 0.752   | 0.849                    | 0.000                      |
| Vermis IV                       | 0.202     | 0.222 | 0.363   | 0.994                    | -0.421                            | 0.219 | 0.054   | 0.208                    | 0.003                      |
| Vermis V                        | -0.180    | 0.217 | 0.408   | 0.994                    | 0.127                             | 0.214 | 0.552   | 0.666                    | -0.001                     |
| Vermis VI                       | -0.002    | 0.223 | 0.994   | 0.994                    | -0.221                            | 0.220 | 0.316   | 0.462                    | 0.002                      |
| Vermis VIIA                     | 0.330     | 0.224 | 0.141   | 0.994                    | -0.440                            | 0.221 | 0.047   | 0.208                    | 0.001                      |
| Vermis VIIIB                    | 0.212     | 0.221 | 0.337   | 0.994                    | -0.339                            | 0.218 | 0.121   | 0.352                    | 0.001                      |
| Vermis VIIIA                    | -0.080    | 0.215 | 0.712   | 0.994                    | -0.317                            | 0.212 | 0.136   | 0.365                    | 0.008                      |
| Vermis VIIIB                    | 0.044     | 0.214 | 0.837   | 0.994                    | -0.459                            | 0.211 | 0.030*  | 0.208                    | 0.009                      |
| Vermis IX                       | -0.051    | 0.215 | 0.813   | 0.994                    | -0.270                            | 0.212 | 0.202   | 0.393                    | 0.005                      |
| Vermis X                        | -0.147    | 0.218 | 0.502   | 0.994                    | -0.011                            | 0.215 | 0.959   | 0.973                    | 0.000                      |
| Lobule III (right)              | -0.013    | 0.214 | 0.953   | 0.994                    | -0.216                            | 0.211 | 0.308   | 0.462                    | 0.002                      |
| Lobule IV (right)               | -0.068    | 0.221 | 0.759   | 0.994                    | -0.174                            | 0.218 | 0.425   | 0.572                    | 0.002                      |
| Lobule V (right)                | -0.147    | 0.220 | 0.504   | 0.994                    | -0.141                            | 0.217 | 0.515   | 0.654                    | 0.003                      |
| Lobule VI (right)               | -0.075    | 0.218 | 0.732   | 0.994                    | -0.282                            | 0.215 | 0.190   | 0.391                    | 0.006                      |
| Lobule Crus 1 (right)           | 0.016     | 0.213 | 0.939   | 0.994                    | -0.281                            | 0.210 | 0.182   | 0.391                    | 0.003                      |
| Lobule Crus 2 (right)           | 0.248     | 0.213 | 0.244   | 0.994                    | -0.527                            | 0.210 | 0.012*  | 0.142                    | 0.005                      |
| Lobule VIIIB (right)            | 0.028     | 0.217 | 0.899   | 0.994                    | -0.454                            | 0.214 | 0.034*  | 0.208                    | 0.010                      |
| Lobule VIIIA (right)            | -0.071    | 0.215 | 0.741   | 0.994                    | -0.400                            | 0.212 | 0.059   | 0.208                    | 0.012                      |
| Lobule VIIIB (right)            | 0.027     | 0.220 | 0.901   | 0.994                    | -0.418                            | 0.217 | 0.055   | 0.208                    | 0.008                      |
| Lobule IX (right)               | -0.215    | 0.217 | 0.323   | 0.994                    | -0.137                            | 0.214 | 0.524   | 0.654                    | 0.006                      |
| Lobule X (right)                | -0.080    | 0.221 | 0.717   | 0.994                    | -0.261                            | 0.218 | 0.231   | 0.426                    | 0.005                      |
| Corpus medullare (right)        | -0.058    | 0.218 | 0.791   | 0.994                    | -0.241                            | 0.215 | 0.262   | 0.437                    | 0.004                      |
| left hand presses (VOL)         | -0.145    | 0.217 | 0.503   | 0.994                    | -0.240                            | 0.214 | 0.262   | 0.576                    | 0.007                      |
| right hand presses (VOL)        | -0.110    | 0.217 | 0.612   | 0.994                    | -0.237                            | 0.214 | 0.269   | 0.576                    | 0.006                      |
| saccades (VOL)                  | -0.123    | 0.222 | 0.580   | 0.994                    | -0.264                            | 0.219 | 0.229   | 0.576                    | 0.007                      |
| action observation (VOL)        | 0.041     | 0.214 | 0.849   | 0.994                    | -0.516                            | 0.211 | 0.014*  | 0.164                    | 0.013                      |
| divided attention (left) (VOL)  | 0.023     | 0.218 | 0.915   | 0.994                    | -0.382                            | 0.215 | 0.076   | 0.327                    | 0.006                      |
| divided attention (right) (VOL) | -0.002    | 0.216 | 0.994   | 0.994                    | -0.392                            | 0.213 | 0.066   | 0.327                    | 0.008                      |
| narrative (VOL)                 | -0.069    | 0.214 | 0.748   | 0.994                    | -0.196                            | 0.212 | 0.355   | 0.592                    | 0.003                      |
| word comprehension (VOL)        | 0.200     | 0.215 | 0.351   | 0.994                    | -0.509                            | 0.212 | 0.016*  | 0.164                    | 0.006                      |
| verbal fluency (VOL)            | 0.041     | 0.216 | 0.850   | 0.994                    | -0.375                            | 0.213 | 0.078   | 0.327                    | 0.006                      |
| autobiographical recall (VOL)   | 0.146     | 0.215 | 0.496   | 0.994                    | -0.577                            | 0.212 | 0.007*  | 0.164                    | 0.011                      |
| left hand presses (GMD)         | -0.105    | 0.217 | 0.630   | 0.994                    | -0.088                            | 0.214 | 0.682   | 0.854                    | 0.001                      |
| right hand presses (GMD)        | -0.150    | 0.215 | 0.483   | 0.994                    | 0.052                             | 0.212 | 0.804   | 0.909                    | 0.000                      |
| saccades (GMD)                  | -0.066    | 0.222 | 0.768   | 0.994                    | 0.009                             | 0.219 | 0.966   | 0.966                    | -0.001                     |
| action observation (GMD)        | -0.011    | 0.224 | 0.961   | 0.994                    | -0.187                            | 0.220 | 0.396   | 0.626                    | 0.001                      |
| divided attention (left) (GMD)  | 0.027     | 0.219 | 0.902   | 0.994                    | -0.223                            | 0.216 | 0.302   | 0.582                    | 0.001                      |
| divided attention (right) (GMD) | -0.122    | 0.217 | 0.572   | 0.994                    | -0.016                            | 0.214 | 0.942   | 0.966                    | 0.000                      |
| narrative (GMD)                 | 0.041     | 0.222 | 0.853   | 0.994                    | -0.075                            | 0.219 | 0.734   | 0.880                    | -0.001                     |
| word comprehension (GMD)        | 0.234     | 0.223 | 0.294   | 0.994                    | -0.254                            | 0.220 | 0.248   | 0.576                    | 0.000                      |
| verbal fluency (GMD)            | -0.024    | 0.221 | 0.913   | 0.994                    | -0.089                            | 0.218 | 0.683   | 0.854                    | 0.000                      |
| autobiographical recall (GMD)   | 0.078     | 0.229 | 0.734   | 0.994                    | -0.217                            | 0.225 | 0.335   | 0.591                    | 0.000                      |
| left hand presses (WMD)         | 0.052     | 0.220 | 0.814   | 0.994                    | 0.147                             | 0.217 | 0.499   | 0.712                    | 0.001                      |
| right hand presses (WMD)        | 0.052     | 0.218 | 0.812   | 0.994                    | 0.037                             | 0.215 | 0.864   | 0.926                    | 0.000                      |
| saccades (WMD)                  | -0.004    | 0.220 | 0.986   | 0.994                    | 0.050                             | 0.217 | 0.819   | 0.909                    | -0.001                     |
| action observation (WMD)        | -0.149    | 0.221 | 0.501   | 0.994                    | 0.368                             | 0.218 | 0.092   | 0.327                    | 0.002                      |
| divided attention (left) (WMD)  | -0.152    | 0.220 | 0.490   | 0.994                    | 0.359                             | 0.217 | 0.098   | 0.327                    | 0.002                      |
| divided attention (right) (WMD) | 0.021     | 0.220 | 0.924   | 0.994                    | 0.156                             | 0.217 | 0.474   | 0.711                    | 0.001                      |
| narrative (WMD)                 | -0.081    | 0.222 | 0.716   | 0.994                    | 0.125                             | 0.219 | 0.570   | 0.777                    | -0.001                     |
| word comprehension (WMD)        | -0.241    | 0.224 | 0.281   | 0.994                    | 0.282                             | 0.221 | 0.201   | 0.576                    | 0.000                      |
| verbal fluency (WMD)            | -0.069    | 0.225 | 0.761   | 0.994                    | 0.225                             | 0.222 | 0.310   | 0.582                    | 0.001                      |
| autobiographical recall (WMD)   | -0.297    | 0.225 | 0.186   | 0.994                    | 0.419                             | 0.222 | 0.059   | 0.327                    | 0.001                      |

Supplementary Table 6: Linear regression results investigating the effect of *Social Responsiveness Scale* (SRS) score (continuous) on deviation scores. SRS scores and square-root transformed SRS scores (given the skewed distribution, see Supplementary

Figure 7) were used as the independent variables. To account for the multiple tests, we applied the *false discovery rate – Benjamini Hochberg* (FDR-BH) correction within each parcellation separately.
